# Supplementary material
Source: Springer Nature journal article supplement (https://www.springermedizin.de/resource/supplementary/13048_2008_3_MOESM1_ESM.pdf/9664700)

**OV4**

**SKOV3**

**PA1**

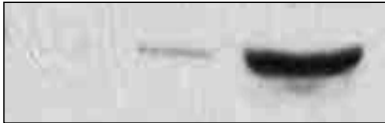

**ST6Gal-I**

Supplement: MOESM1 [file 9664700]
